# Supplementary material for: Hepatitis B virus infection and the risk of gastrointestinal cancers among Chinese population: A prospective cohort study
Source: PubMed Central journal article supplement (PMC9300134; doi:10.1002/ijc.33891), 2021-12-14
Supplement: IJC-150-1018-s001.pdf [file IJC-150-1018-s001.pdf]

Title: Hepatitis B virus infection and the risk of gastrointestinal cancers among Chinese population: a prospective cohort study

Author list: Tong Liu, Chunhua Song, Youcheng Zhang, Sarah Tan Siyin, Qi Zhang, Mengmeng Song, Liying Cao, Hanping Shi

Supplementary table 1. The association of HBV infection with the risk of GI cancer exclude participants who occurred GI cancer within the 1<sup>st</sup> year or with cirrhosis.

|                                                                     | HBsAg Seronegative |              | HBsAg Seropositive |              | Adjusted Hazard Ratios<br>(95% CI) |
|---------------------------------------------------------------------|--------------------|--------------|--------------------|--------------|------------------------------------|
|                                                                     | Cases              | Person-years | Cases              | Person-years |                                    |
| <b>Excluding GI cancers occurred within the 1<sup>st</sup> year</b> |                    |              |                    |              |                                    |
| Liver cancer <sup>a</sup>                                           | 217                | 1126615      | 155                | 30881        | 21.26(16.93~26.70)                 |
| Gallbladder or extrahepatic bile duct cancer <sup>b</sup>           | 105                | 1127009      | 43                 | 31285        | 12.53(8.45~18.57)                  |
| Colorectal cancer                                                   | 597                | 1124623      | 29                 | 31246        | 1.77(1.16~2.97)                    |
| Pancreatic cancer                                                   | 148                | 1126905      | 12                 | 31332        | 1.82(1.08~3.96)                    |
| <b>Excluding patients with cirrhosis</b>                            |                    |              |                    |              |                                    |
| Liver cancer <sup>a</sup>                                           | 229                | 1125971      | 138                | 29978        | 22.99(18.49~28.59)                 |
| Gallbladder or extrahepatic bile duct cancer <sup>b</sup>           | 109                | 1126340      | 36                 | 30276        | 12.92(9.46~20.47)                  |
| Colorectal cancer                                                   | 633                | 1123979      | 26                 | 30205        | 1.71(1.35~2.)                      |
| Pancreatic cancer                                                   | 151                | 1126237      | 11                 | 30291        | 1.72(1.11~3.89)                    |

Note: All models were adjusted for age, sex, BMI, TG, TC, hs-CRP, TBil, ALT, diabetes, family income, educational background, marital status, salt consumption, current smoker, drinking status, physical activity, and family history of cancer.

a: Further adjusted for liver cirrhosis and fatty liver disease.

b: Further adjusted for gallstone disease and gallbladder polyp.

Supplementary table 2. The association of HBV infection with the risk of GI cancer by time window of cancer diagnosis.

|                                                                          | HBsAg Seronegative |              | HBsAg Seropositive |              | Adjusted Hazard Ratios<br>(95% CI) |
|--------------------------------------------------------------------------|--------------------|--------------|--------------------|--------------|------------------------------------|
|                                                                          | Cases              | Person-years | Cases              | Person-years |                                    |
| <b>The adjusted HRs (95%CI) for GI cancer diagnosis &lt; 3 years</b>     |                    |              |                    |              |                                    |
| Liver cancer <sup>a</sup>                                                | 70                 | 3019         | 44                 | 156          | 9.37(5.91~14.86)                   |
| Gallbladder or extrahepatic bile duct cancer <sup>b</sup>                | 17                 | 3074         | 3                  | 183          | 2.68(0.57~12.52)                   |
| Colorectal cancer                                                        | 113                | 3001         | 2                  | 181          | 0.38(0.09~1.54)                    |
| Pancreatic cancer                                                        | 33                 | 3057         | 1                  | 181          | 0.55(0.07~4.04)                    |
| <b>The adjusted HRs (95%CI) for GI cancer diagnosis within 3-5 years</b> |                    |              |                    |              |                                    |
| Liver cancer <sup>a</sup>                                                | 30                 | 8044         | 31                 | 341          | 29.66(16.84~52.22)                 |
| Gallbladder or extrahepatic bile duct cancer <sup>b</sup>                | 8                  | 8061         | 0                  | 377          | NA                                 |
| Colorectal cancer                                                        | 110                | 7091         | 3                  | 373          | 0.66(0.21~2.11)                    |
| Pancreatic cancer                                                        | 13                 | 8052         | 1                  | 370          | 1.94(0.24~15.39)                   |
| <b>The adjusted HRs (95%CI) for GI cancer diagnosis &gt; 5 years</b>     |                    |              |                    |              |                                    |
| Liver cancer <sup>a</sup>                                                | 136                | 1115566      | 100                | 30397        | 24.39(18.44~32.27)                 |
| Gallbladder or extrahepatic bile duct cancer <sup>b</sup>                | 86                 | 1115876      | 41                 | 30736        | 19.99(13.72~29.11)                 |

---

|                   |     |         |    |       |                 |
|-------------------|-----|---------|----|-------|-----------------|
| Colorectal cancer | 413 | 1114559 | 24 | 30692 | 1.80(1.12~2.89) |
| Pancreatic cancer | 108 | 1115800 | 11 | 30781 | 2.03(1.09~3.67) |

---

**Note: All models were adjusted for age, sex, BMI, TG, TC, hs-CRP, TBil, ALT, diabetes, family income, educational background, marital status, salt consumption, current smoker, drinking status, physical activity, and family history of cancer.**

**a: Further adjusted for liver cirrhosis and fatty liver disease.**

**b: Further adjusted for gallstone disease and gallbladder polyp.**
